# Supplementary material for: A novel quartz-crystal microbalance humidity sensor based on solution-processible indium oxide quantum dots
Source: Royal Society of Chemistry journal article supplement (doi:10.1039/c9ra06385d), 2019-01-01
Supplement: c9ra06385d1.pdf [file c9ra06385d1.pdf]

## Supplementary material

### **A novel quartz-crystal microbalance humidity sensor based on solution-processible indium oxide quantum dots**

Hao Kan<sup>a,b</sup>, Min Li<sup>c</sup>, Hui Li<sup>a</sup>, Chong Li<sup>a</sup>, Jian Zhou<sup>d</sup>, Chen Fu<sup>a</sup>, Jingting Luo<sup>a\*</sup>, Yongqing Fu<sup>e</sup>

<sup>a</sup> Shenzhen Key Laboratory of Advanced Thin Films and Applications, College of Physics and Optoelectronic Engineering, Shenzhen University, 518060, Shenzhen, China

<sup>b</sup> Key Laboratory of Optoelectronic Devices and Systems of Ministry of Education and Guangdong Province, College of Optoelectronic Engineering, Shenzhen University, 518060, Shenzhen, China

<sup>c</sup> School of Electrical Engineering, Nanjing Institute of Industry Technology, 210023, Nanjing, China

<sup>d</sup> State Key Laboratory of Advanced Design and Manufacturing for Vehicle Body, College of Mechanical and Vehicle Engineering, Hunan University, Changsha 410082, China

<sup>e</sup> Faculty of Engineering and Environment, Northumbria University, Newcastle Upon Tyne, Newcastle NE1 8ST, UK

\*Corresponding author: Jingting Luo; Email: [luojt@szu.edu.cn](mailto:luojt@szu.edu.cn)

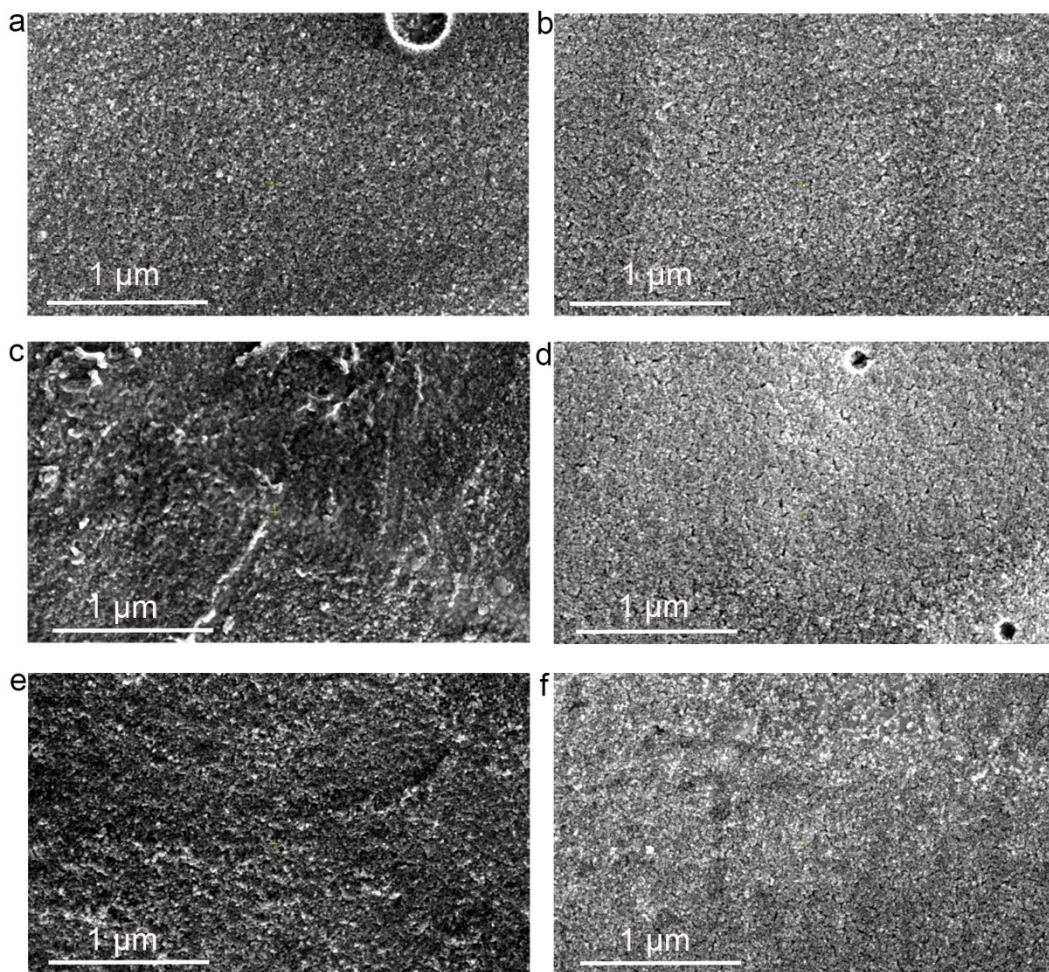

Figure S1. High-magnification SEM of the (a) QCM-1, (c) QCM-2 and (e) QCM-3 before annealing, high-magnification SEM of (b) QCM-1, (d) QCM-2 and (f) QCM-3 after annealing.

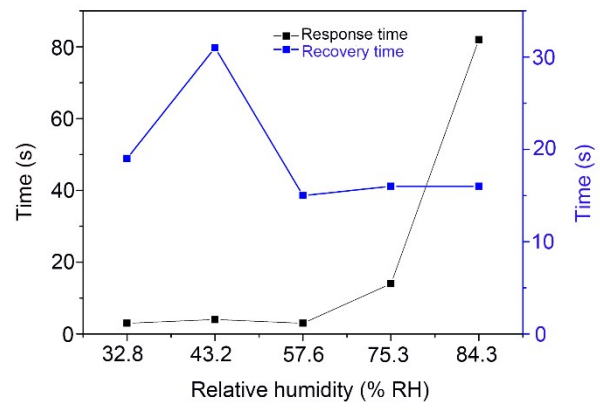

Figure S2. The response/recovery time of QCM-3 under different relative humidity.
